# Supplementary material for: Performative Masculinity: A META-Ethnography of Experiences of Men in Academic and Clinical Nursing
Source: MDPI journal article supplement (doi:10.3390/ijerph192214813), 2022-11-10
Supplement: s1 [file s1]

**Table S1.** Quality assessment of included qualitative studies with the Critical Skills Appraisal Program.

| Author(s),<br>Date                      | Clear state-<br>ment of<br>aims | Appropriate<br>methodology | Appropriate<br>design | Appropriate<br>recruitment<br>strategy | Appropriate data<br>collection | Relationship be-<br>tween researcher<br>and participants<br>considered | Ethical is-<br>sues consid-<br>ered | Rigor of<br>data analy-<br>sis | Clear statement<br>of findings | Is the re-<br>search valu-<br>able? | Quality<br>Score |
|-----------------------------------------|---------------------------------|----------------------------|-----------------------|----------------------------------------|--------------------------------|------------------------------------------------------------------------|-------------------------------------|--------------------------------|--------------------------------|-------------------------------------|------------------|
| Ayala et al.,<br>(2014)                 | ✓                               | ✓                          | ✓                     | ✓                                      | ✓                              |                                                                        | ✓                                   | ✓                              | ✓                              | ✓                                   | 9/10             |
| Dyck et al.<br>(2009)                   | ✓                               | ✓                          | ✓                     | ✓                                      | ✓                              |                                                                        | ✓                                   | ✓                              | ✓                              | ✓                                   | 9/10             |
| Evans, J.A.<br>(2002)                   | ✓                               | ✓                          | ✓                     | ✓                                      | ✓                              |                                                                        | ✓                                   | ✓                              | ✓                              | ✓                                   | 9/10             |
| Fisher, M. J.<br>(2009)                 | ✓                               | ✓                          | ✓                     | ✓                                      | ✓                              | ✓                                                                      | ✓                                   | ✓                              | ✓                              | ✓                                   | 10/10            |
| Harding, T.<br>(2007)                   | ✓                               | ✓                          | ✓                     | ✓                                      | ✓                              | ✓                                                                      | ✓                                   | ✓                              | ✓                              | ✓                                   | 10/10            |
| Hollup, O.<br>(2014)                    | ✓                               | ✓                          | ✓                     | ✓                                      | ✓                              | ✓                                                                      | ✓                                   |                                | ✓                              | ✓                                   | 9/10             |
| Holyoake, D.<br>(2002)                  | ✓                               | ✓                          | ✓                     |                                        | ✓                              |                                                                        |                                     | ✓                              | ✓                              | ✓                                   | 7/10             |
| Hsu, T. K.<br>(2001)                    | ✓                               | ✓                          | ✓                     | ✓                                      | ✓                              | ✓                                                                      | ✓                                   |                                | ✓                              | ✓                                   | 9/10             |
| Huang, Y. S. &<br>Yang, H. C.<br>(2011) | ✓                               | ✓                          | ✓                     | ✓                                      | ✓                              |                                                                        | ✓                                   | ✓                              | ✓                              | ✓                                   | 9/10             |
| Kumpula, E. &<br>Ekstrand, P.<br>(2009) | ✓                               | ✓                          | ✓                     | ✓                                      | ✓                              |                                                                        | ✓                                   | ✓                              | ✓                              | ✓                                   | 9/10             |
| O'Connor, T.<br>(2015)                  | ✓                               | ✓                          | ✓                     | ✓                                      | ✓                              | ✓                                                                      |                                     | ✓                              | ✓                              | ✓                                   | 9/10             |
